# Supplementary material for: A novel pyroptosis-related gene signature exhibits distinct immune cells infiltration landscape in Wilms’ tumor
Source: Springer Nature journal article supplement (doi:10.1186/s12887-024-04731-0), 2024-04-27

**A**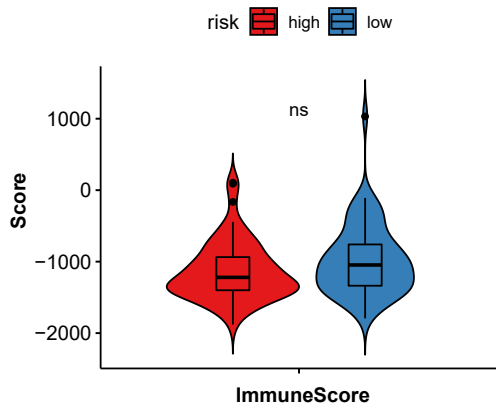**B**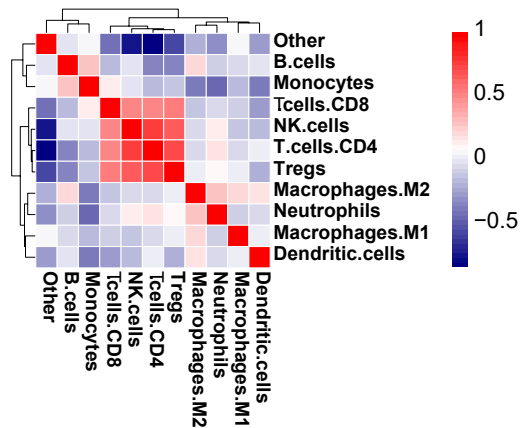**C**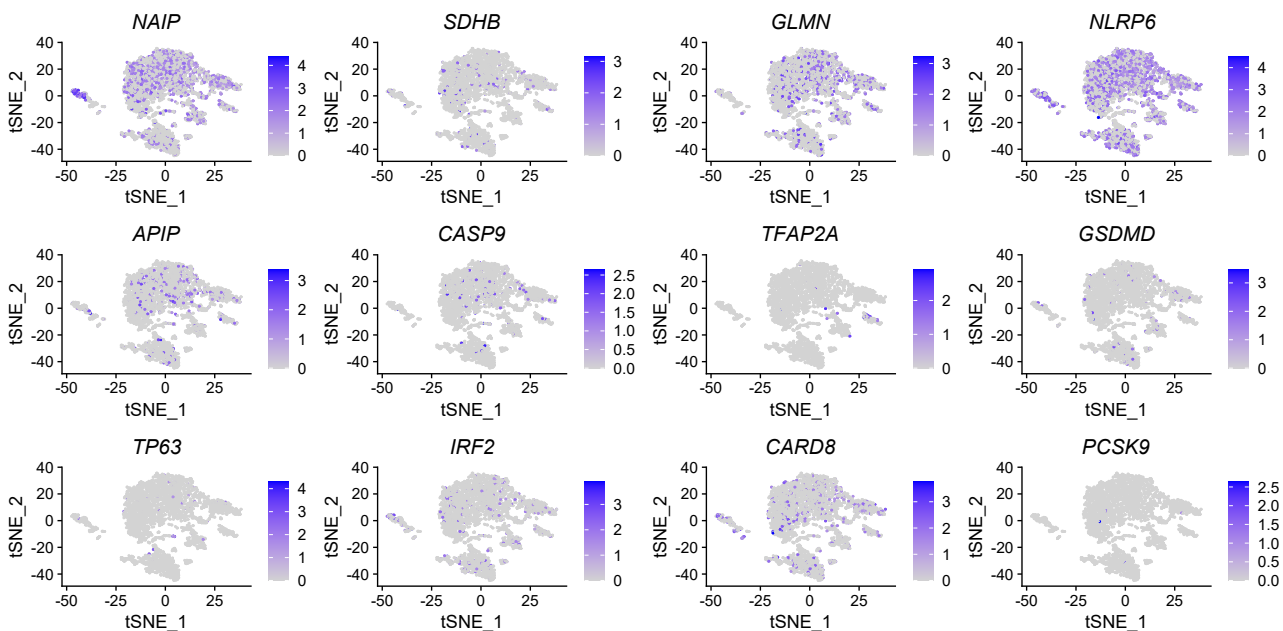**D**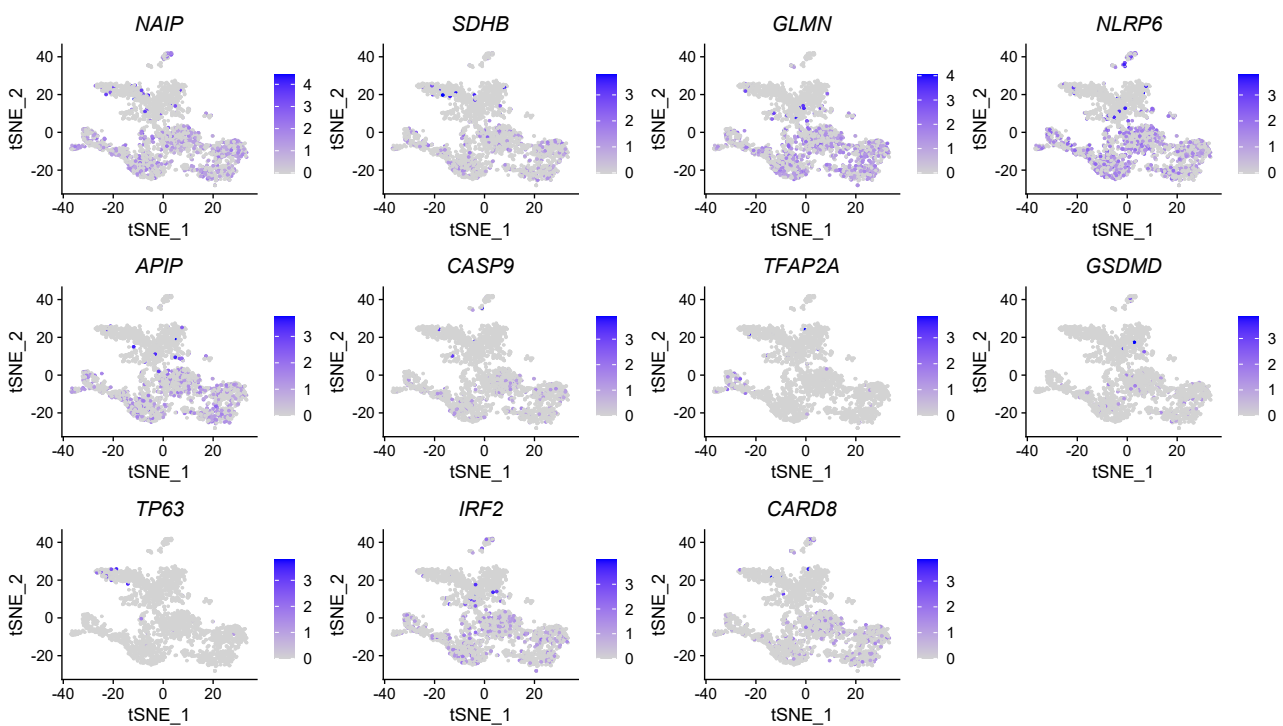

Supplement: MOESM1 [file 27027394]
